# Supplementary material for: Evaluation of a Tool to Measure Pharmacists’ Readiness to Manage Intimate Partner Violence
Source: MDPI journal article supplement (doi:10.3390/pharmacy6030066), 2018-07-12
Supplement: s1 [file s1]

## Supplement 2 Additional Participant Characteristics

| Training Characteristics                                                                    | Percent        | n  |
|---------------------------------------------------------------------------------------------|----------------|----|
| Postgraduate training                                                                       |                |    |
| Residency                                                                                   | 16.0%          | 23 |
| Fellowship                                                                                  | 2.8%           | 4  |
| Graduate School                                                                             | 19.4%          | 28 |
| Other                                                                                       | 31.9%          | 46 |
| Practice Characteristics                                                                    | Percent        | n  |
| Type of pharmacy                                                                            |                |    |
| Chain                                                                                       | 11.8%          | 17 |
| Grocery/General Merchandise                                                                 | 28.5%          | 41 |
| Independent                                                                                 | 34.0%          | 49 |
| Other                                                                                       | 32.6%          | 47 |
| Position                                                                                    |                |    |
| Owner/Partner                                                                               | 18.1%          | 26 |
| Employee manager/Assistant Manager                                                          | 27.8%          | 40 |
| Staff/employee pharmacist                                                                   | 47.2%          | 68 |
| Relief pharmacist                                                                           | 2.1%           | 3  |
| Other                                                                                       | 4.9%           | 7  |
| Extent involved in key decisions                                                            |                |    |
| Not at all                                                                                  | 15.3%          | 22 |
| A little                                                                                    | 17.4%          | 25 |
| Some                                                                                        | 16.0%          | 23 |
| A good amount                                                                               | 27.1%          | 39 |
| To a great extent                                                                           | 24.3%          | 35 |
| Offer advanced pharmacy services                                                            |                |    |
| YES                                                                                         | 53.5%          | 77 |
| NO                                                                                          | 46.5%          | 67 |
| Have a dedicated private counseling area                                                    |                |    |
| YES                                                                                         | 57.6%          | 83 |
| NO                                                                                          | 42.4%          | 61 |
| Frequency of use of private counseling area                                                 |                |    |
| Never                                                                                       | --             | 0  |
| Rarely                                                                                      | 13.3%          | 11 |
| Sometimes                                                                                   | 51.8%          | 43 |
| Often                                                                                       | 34.9%          | 29 |
| <b>Mean (±SD)</b>                                                                           |                |    |
| Average number of fills per day in your pharmacy                                            | 326.3 (±674.3) |    |
| Percent of fills involving patient counseling other than ordinary prescription consultation | 22.7% (±26.3)  |    |
| Average number of pharmacist FTEs in your pharmacy                                          | 5.76 (±17.1)   |    |
| Average number of pharmacy tech FTEs in your pharmacy                                       | 7.58 (±26.8)   |    |

| <b>Geographic Distribution of<br/>Participants by State</b> | <b>% reported residing in<br/>each state</b> |
|-------------------------------------------------------------|----------------------------------------------|
| Alabama                                                     | 1.01%                                        |
| Alaska                                                      | 0.00%                                        |
| Arizona                                                     | 1.52%                                        |
| Arkansas                                                    | 1.52%                                        |
| California                                                  | 4.55%                                        |
| Colorado                                                    | 2.53%                                        |
| Connecticut                                                 | 0.00%                                        |
| Delaware                                                    | 1.01%                                        |
| District of Columbia                                        | 0.00%                                        |
| Florida                                                     | 4.04%                                        |
| Georgia                                                     | 1.52%                                        |
| Hawaii                                                      | 1.01%                                        |
| Idaho                                                       | 0.00%                                        |
| Illinois                                                    | 4.04%                                        |
| Indiana                                                     | 3.54%                                        |
| Iowa                                                        | 1.01%                                        |
| Kansas                                                      | 2.02%                                        |
| Kentucky                                                    | 1.01%                                        |
| Louisiana                                                   | 0.51%                                        |
| Maine                                                       | 2.02%                                        |
| Maryland                                                    | 2.53%                                        |
| Massachusetts                                               | 1.52%                                        |
| Michigan                                                    | 5.05%                                        |
| Minnesota                                                   | 3.03%                                        |
| Mississippi                                                 | 0.00%                                        |
| Missouri                                                    | 4.04%                                        |
| Montana                                                     | 0.51%                                        |

|                |       |
|----------------|-------|
| Nebraska       | 1.01% |
| Nevada         | 1.01% |
| New Hampshire  | 1.52% |
| New Jersey     | 3.03% |
| New Mexico     | 0.51% |
| New York       | 6.57% |
| North Carolina | 5.56% |
| North Dakota   | 1.01% |
| Ohio           | 6.06% |
| Oklahoma       | 0.00% |
| Oregon         | 0.00% |
| Pennsylvania   | 7.07% |
| Puerto Rico    | 0.00% |
| Rhode Island   | 0.00% |
| South Carolina | 1.01% |
| South Dakota   | 0.00% |
| Tennessee      | 2.53% |
| Texas          | 3.54% |
| Utah           | 0.51% |
| Vermont        | 0.51% |
| Virginia       | 2.02% |
| Washington     | 3.54% |
| West Virginia  | 0.00% |
| Wisconsin      | 3.54% |
| Wyoming        | 0.00% |
